# Supplementary material for: Intervertebral disc therapies for non-specific chronic low back pain: a systematic review and meta-analysis
Source: PubMed Central journal article supplement — Ther Adv Musculoskelet Dis. 2021 Jul 16;13:1759720X211028001. doi: 10.1177/1759720X211028001 (PMC8287365; doi:10.1177/1759720x211028001), 2021-07-16

## Appendix 1. Preferred Reporting Items for Systematic Reviews and Meta-Analyses (PRISMA).

| Section/topic             | #  | Checklist item                                                                                                                                                                                                                                                                                              | Reported on page # |
|---------------------------|----|-------------------------------------------------------------------------------------------------------------------------------------------------------------------------------------------------------------------------------------------------------------------------------------------------------------|--------------------|
| <b>TITLE</b>              |    |                                                                                                                                                                                                                                                                                                             |                    |
| Title                     | 1  | Identify the report as a systematic review, meta-analysis, or both.                                                                                                                                                                                                                                         | p.1                |
| <b>ABSTRACT</b>           |    |                                                                                                                                                                                                                                                                                                             |                    |
| Structured summary        | 2  | Provide a structured summary including, as applicable: background; objectives; data sources; study eligibility criteria, participants, and interventions; study appraisal and synthesis methods; results; limitations; conclusions and implications of key findings; systematic review registration number. | p.3                |
| <b>INTRODUCTION</b>       |    |                                                                                                                                                                                                                                                                                                             |                    |
| Rationale                 | 3  | Describe the rationale for the review in the context of what is already known.                                                                                                                                                                                                                              | p.5                |
| Objectives                | 4  | Provide an explicit statement of questions being addressed with reference to participants, interventions, comparisons, outcomes, and study design (PICOS).                                                                                                                                                  | p.6                |
| <b>METHODS</b>            |    |                                                                                                                                                                                                                                                                                                             |                    |
| Protocol and registration | 5  | Indicate if a review protocol exists, if and where it can be accessed (e.g., Web address), and, if available, provide registration information including registration number.                                                                                                                               | p.4, p.6           |
| Eligibility criteria      | 6  | Specify study characteristics (e.g., PICOS, length of follow-up) and report characteristics (e.g., years considered, language, publication status) used as criteria for eligibility, giving rationale.                                                                                                      | p.6, p.7           |
| Information sources       | 7  | Describe all information sources (e.g., databases with dates of coverage, contact with study authors to identify additional studies) in the search and date last searched.                                                                                                                                  | p.6                |
| Search                    | 8  | Present full electronic search strategy for at least one database, including any limits used, such that it could be repeated.                                                                                                                                                                               | Appendices 2 and 3 |
| Study selection           | 9  | State the process for selecting studies (i.e., screening, eligibility, included in systematic review, and, if applicable, included in the meta-analysis).                                                                                                                                                   | p.6, p.7           |
| Data collection process   | 10 | Describe method of data extraction from reports (e.g., piloted forms, independently, in duplicate) and any processes for obtaining and confirming data from investigators.                                                                                                                                  | p.7, p.8           |

|                                    |    |                                                                                                                                                                                                                        |            |
|------------------------------------|----|------------------------------------------------------------------------------------------------------------------------------------------------------------------------------------------------------------------------|------------|
| Data items                         | 11 | List and define all variables for which data were sought (e.g., PICOS, funding sources) and any assumptions and simplifications made.                                                                                  | Appendix 4 |
| Risk of bias in individual studies | 12 | Describe methods used for assessing risk of bias of individual studies (including specification of whether this was done at the study or outcome level), and how this information is to be used in any data synthesis. | p.8        |
| Summary measures                   | 13 | State the principal summary measures (e.g., risk ratio, difference in means).                                                                                                                                          | p.8, p.9   |
| Synthesis of results               | 14 | Describe the methods of handling data and combining results of studies, if done, including measures of consistency (e.g., $I^2$ ) for each meta-analysis.                                                              | p.8, p.9   |

Page 1 of 2

| Section/topic                 | #  | Checklist item                                                                                                                                                                                           | Reported on page #                                       |
|-------------------------------|----|----------------------------------------------------------------------------------------------------------------------------------------------------------------------------------------------------------|----------------------------------------------------------|
| Risk of bias across studies   | 15 | Specify any assessment of risk of bias that may affect the cumulative evidence (e.g., publication bias, selective reporting within studies).                                                             | p.7. p.8                                                 |
| Additional analyses           | 16 | Describe methods of additional analyses (e.g., sensitivity or subgroup analyses, meta-regression), if done, indicating which were pre-specified.                                                         | p.8, p.9                                                 |
| <b>RESULTS</b>                |    |                                                                                                                                                                                                          |                                                          |
| Study selection               | 17 | Give numbers of studies screened, assessed for eligibility, and included in the review, with reasons for exclusions at each stage, ideally with a flow diagram.                                          | p.9, figure 1                                            |
| Study characteristics         | 18 | For each study, present characteristics for which data were extracted (e.g., study size, PICOS, follow-up period) and provide the citations.                                                             | p.9, p.10, Table 1                                       |
| Risk of bias within studies   | 19 | Present data on risk of bias of each study and, if available, any outcome level assessment (see item 12).                                                                                                | Appendix 5                                               |
| Results of individual studies | 20 | For all outcomes considered (benefits or harms), present, for each study: (a) simple summary data for each intervention group (b) effect estimates and confidence intervals, ideally with a forest plot. | p.10, p.11, p.12,13, Figures 2 and 3, Appendices 7 to 17 |
| Synthesis of results          | 21 | Present results of each meta-analysis done, including confidence intervals and measures of consistency.                                                                                                  | Figures 2 and 3, Appendices                              |

|                             |    |                                                                                                                                                                                      |                     |
|-----------------------------|----|--------------------------------------------------------------------------------------------------------------------------------------------------------------------------------------|---------------------|
|                             |    |                                                                                                                                                                                      | 7, 8, 10, 16 and 17 |
| Risk of bias across studies | 22 | Present results of any assessment of risk of bias across studies (see Item 15).                                                                                                      | NA                  |
| Additional analysis         | 23 | Give results of additional analyses, if done (e.g., sensitivity or subgroup analyses, meta-regression [see Item 16]).                                                                | Appendix 7          |
| <b>DISCUSSION</b>           |    |                                                                                                                                                                                      |                     |
| Summary of evidence         | 24 | Summarize the main findings including the strength of evidence for each main outcome; consider their relevance to key groups (e.g., healthcare providers, users, and policy makers). | p.14                |
| Limitations                 | 25 | Discuss limitations at study and outcome level (e.g., risk of bias), and at review-level (e.g., incomplete retrieval of identified research, reporting bias).                        | p.14, p.15          |
| Conclusions                 | 26 | Provide a general interpretation of the results in the context of other evidence, and implications for future research.                                                              | p.15                |
| <b>FUNDING</b>              |    |                                                                                                                                                                                      |                     |
| Funding                     | 27 | Describe sources of funding for the systematic review and other support (e.g., supply of data); role of funders for the systematic review.                                           | p.4, p.9            |

## **Appendix 2. Search strategy for EMBASE database.**

1/ Low back pain

2/ Intervertebral disk disease

3/ Intradiscal

4/ Methylene

5/ Tumor necrosis factor antibody

6/ Interleukin 6

7/ Ethanol

8/ Ozone

9/ Polyacrylonitrile

10/ Chymopapain

11/ Collagenase

12/ Platelet-rich plasma cell

13/ Stem cell

14/ glucocorticoid

15/ OR 3-14

16/ 1 AND 2 AND 15

### **Appendix 3. Search strategy for MEDLINE database.**

1/ "low back pain"[MH]

2/ "low back pain"[TW]

3/"lumbago"[TW]

4/"mechanical low back pain"[TW]

5/ "low back ache"[TW]

6/"lower back pains"[TW]

7/"pain, low back"[TW]

8/"low backache"[TW]

9/"low back pains"[TW]

10/"back pain, low"[TW]

11/"backache, low"[TW]

12/ "lower back pain"[TW]

13/ "back pain, lower"[TW]

14/"postural low back pain"[TW]

15/ "recurrent low back pain"[TW]

16/ "Low back pain (finding)"[TW]

17/"Low back syndrome"[TW]

18/"Lumbalgia"[TW]

19/ "Low back pain (disorder)"[TW]

20/"Lumbar pain"[TW]

**21/ 1-20/OR**

22/"Intervertebral Disk"[All Fields]

23/ "Intervertebral Disc"[All Fields])

24/"Intervertebral Disc Degeneration"[Mesh]

**25/ 22-24/OR**

26/"Interleukin-6"[Mesh] OR

27/"anti il6"[All Fields]) OR

28/glucocorticoid[All Fields] OR

29/glucocorticoid\*[All Fields] OR

30/"Glucocorticoids"[Mesh] OR

31/ Stem cell\*[All Fields] OR

32/ "Stem Cells"[Mesh] OR

33/"platelet-rich plasma"[Mesh] OR

34/"platelet-rich"[All Fields]

35/ "platelet-rich plasma"[All Fields] OR

36/ Collagenase[All Fields] OR

37/ collagenase\*[All Fields])OR

38/ "Collagenases"[Mesh])) OR

39/"chymopapain"[MeSH Terms] OR

40/"chymopapain"[All Fields] OR

41/"polyacrylonitrile"[Supplementary Concept] OR

42/ "polyacrylonitrile"[All Fields] OR

43/"ozone"[MeSH Terms] OR

44/"ozone"[All Fields] OR

45/"ethanol"[All Fields] OR

46/ "Ethanol"[Mesh]) OR

47/ il6[All Fields] OR

48/ "anti tnf"[All Fields] OR

49/ "Tumor Necrosis Factor-alpha"[Mesh] OR

50/ methylene[All Fields] OR

51/ "Intervertebral Disc Chemolysis"[Mesh]) OR

52/ intradiscal[All Fields] OR

53/ intradiskal[All Fields] OR

54/ "disk injection"[All Fields] OR

55/ "disc injection"[All Fields] OR

56/"disc therapy"[All Fields] OR

**57/ 26-56/OR**

**58/ 21 AND 25 AND 57**

## Appendix 4. Extraction form.

### PART ONE: REVIEW, REVIEWER AND STUDY INFORMATION

|                                                                  |                                                                                                                      |
|------------------------------------------------------------------|----------------------------------------------------------------------------------------------------------------------|
| <b>Study ID</b><br>(Surname Year:<br>as it appears in<br>RevMan) | _____                                                                                                                |
| <b>Name of the<br/>reviewer</b>                                  | <input type="checkbox"/> CD<br><br><input type="checkbox"/> SL<br><br><input type="checkbox"/> Other: _____          |
| <b>Date form<br/>completed</b>                                   | _ _ _ _ _ _ _ _ _ _ _ _ _ _ _ _                                                                                      |
| <b>First author</b>                                              |                                                                                                                      |
| <b>Article title</b>                                             |                                                                                                                      |
| <b>Year of<br/>publication</b>                                   |                                                                                                                      |
| <b>Journal</b>                                                   |                                                                                                                      |
| <b>Volume</b>                                                    |                                                                                                                      |
| <b>Issue</b>                                                     |                                                                                                                      |
| <b>Page number</b>                                               |                                                                                                                      |
| <b>Language of<br/>publication</b>                               | <input type="checkbox"/> French<br><br><input type="checkbox"/> English<br><br><input type="checkbox"/> Other: _____ |
| <b>Type of report</b>                                            | <input type="checkbox"/> Full                                                                                        |



|                                          |                                                                                             |
|------------------------------------------|---------------------------------------------------------------------------------------------|
|                                          | <input type="checkbox"/> <b>Abstract</b><br><br><input type="checkbox"/> <b>Unpublished</b> |
| <b>Contact details</b><br><b>(email)</b> | _____                                                                                       |

**PART TWO: STUDY ELIGIBILITY**

**METHODS**

|                                                     | <b>Descriptions as stated in report/paper</b>                                                                                                                                                                                                                                                    | <b>Location in text</b> |
|-----------------------------------------------------|--------------------------------------------------------------------------------------------------------------------------------------------------------------------------------------------------------------------------------------------------------------------------------------------------|-------------------------|
| <b>Aim of study (as stated in the trial report)</b> |                                                                                                                                                                                                                                                                                                  |                         |
| <b>Study Design</b>                                 | <input type="checkbox"/> <b>Parallel group</b><br><br><input type="checkbox"/> <b>Cross-over</b><br><br><input type="checkbox"/> <b>Cluster</b><br><br><input type="checkbox"/> <b>Factorial</b><br><br><input type="checkbox"/> <b>Split body</b><br><br><input type="checkbox"/> <b>Other:</b> |                         |
| <b>Number of study arms</b>                         | <input type="checkbox"/> <b>2</b><br><br><input type="checkbox"/> <b>3</b><br><br><input type="checkbox"/> <b>Other:</b>                                                                                                                                                                         |                         |
| <b>Study centres</b>                                | <input type="checkbox"/> <b>Single</b><br><br><input type="checkbox"/> <b>Multi</b><br><br><input type="checkbox"/> <b>Unclear</b>                                                                                                                                                               |                         |
| <b>Study duration</b>                               | _ _  months                                                                                                                                                                                                                                                                                      |                         |

|                              |                                                                                                                       |  |
|------------------------------|-----------------------------------------------------------------------------------------------------------------------|--|
| <b>Funding source</b>        | <input type="checkbox"/> <b>Yes:</b><br><input type="checkbox"/> <b>No</b><br><input type="checkbox"/> <b>Unclear</b> |  |
| <b>Conflicts of interest</b> | <input type="checkbox"/> <b>Yes:</b><br><input type="checkbox"/> <b>No</b><br><input type="checkbox"/> <b>Unclear</b> |  |
| <b>Notes</b>                 |                                                                                                                       |  |

## PARTICIPANTS

|                                                                                                         | <b>Description as stated in report/paper</b>                                                                                                                                                                                        | <b>Location in text or source</b> |
|---------------------------------------------------------------------------------------------------------|-------------------------------------------------------------------------------------------------------------------------------------------------------------------------------------------------------------------------------------|-----------------------------------|
| <b>Setting</b>                                                                                          | <input type="checkbox"/> <b>Primary care</b><br><input type="checkbox"/> <b>Secondary care</b><br><input type="checkbox"/> <b>Tertiary care</b><br><input type="checkbox"/> <b>Mixed</b><br><input type="checkbox"/> <b>Unclear</b> |                                   |
| <b>Country</b>                                                                                          |                                                                                                                                                                                                                                     |                                   |
| <b>Inclusion criteria</b>                                                                               |                                                                                                                                                                                                                                     |                                   |
| <b>Exclusion criteria</b>                                                                               |                                                                                                                                                                                                                                     |                                   |
| <b>At least 1 clinical sign consistent with discogenic syndrome or positive provocative discography</b> | <input type="checkbox"/> <b>Yes:</b><br><input type="checkbox"/> <b>No</b><br><input type="checkbox"/> <b>Unclear</b>                                                                                                               |                                   |

|                                                                                |                                                                                                                                                                                                                                                                                                                       |  |
|--------------------------------------------------------------------------------|-----------------------------------------------------------------------------------------------------------------------------------------------------------------------------------------------------------------------------------------------------------------------------------------------------------------------|--|
| <p><b>Consistent IVD lesion on imaging (X-Ray, MRI or CT-scan)</b></p>         | <p><b>IVDDD</b></p> <p><input type="checkbox"/> <b>Yes:</b></p> <p><input type="checkbox"/> <b>No</b></p> <p><input type="checkbox"/> <b>Unclear</b></p><br><p><b>Modic 1</b></p> <p><input type="checkbox"/> <b>Yes</b></p> <p><input type="checkbox"/> <b>No</b></p> <p><input type="checkbox"/> <b>Unclear</b></p> |  |
| <p><b>Total number of patients with history of lumbar surgery</b></p>          | <p> _ _ _ </p>                                                                                                                                                                                                                                                                                                        |  |
| <p><b>Psychosocial Risk factors</b></p>                                        | <p><input type="checkbox"/> <b>Low</b></p> <p><input type="checkbox"/> <b>Moderate</b></p> <p><input type="checkbox"/> <b>High</b></p> <p><input type="checkbox"/> <b>Unclear</b></p>                                                                                                                                 |  |
| <p><b>Total number of randomised participants</b></p>                          | <p> _ _ _ </p>                                                                                                                                                                                                                                                                                                        |  |
| <p><b>Total number of participants analysed</b></p>                            | <p> _ _ _ </p>                                                                                                                                                                                                                                                                                                        |  |
| <p><b>Total number of participants lost to follow up (including death)</b></p> | <p> _ _ _ </p>                                                                                                                                                                                                                                                                                                        |  |
| <p><b>Baseline imbalances</b></p>                                              |                                                                                                                                                                                                                                                                                                                       |  |
| <p><b>Total number of participants who completed higher education</b></p>      | <p> _ _ _ </p>                                                                                                                                                                                                                                                                                                        |  |
| <p><b>Total number of participants who are on sick leave</b></p>               | <p> _ _ _ </p>                                                                                                                                                                                                                                                                                                        |  |
| <p><b>Age: mean (SD)</b></p>                                                   | <p><b>Comparator:</b>  _ _ _ . _ _  ( _ _ _ . _ _ )</p> <p><b>Experimental 1:</b>  _ _ _ . _ _  ( _ _ _ . _ _ )</p> <p><b>Experimental 2:</b>  _ _ _ . _ _  ( _ _ _ . _ _ )</p>                                                                                                                                       |  |

|                              |                                                                                                                                                                             |  |
|------------------------------|-----------------------------------------------------------------------------------------------------------------------------------------------------------------------------|--|
| <b>Sex : n/N (%) females</b> | <b>Comparator:</b>  _ _ / _ _ <br>( _ _ .  _ _ %)<br><br><b>Experimental 1:</b>  _ _ / _ _ <br>( _ _ .  _ _ %)<br><br><b>Experimental 2:</b>  _ _ / _ _ <br>( _ _ .  _ _ %) |  |
| <b>Notes</b>                 |                                                                                                                                                                             |  |

## EXPERIMENTAL GROUP

|                                               | Description as stated in report/paper                                                                                                                                                                                                                                                | Location in text |
|-----------------------------------------------|--------------------------------------------------------------------------------------------------------------------------------------------------------------------------------------------------------------------------------------------------------------------------------------|------------------|
| <b>Experimental intervention</b>              |                                                                                                                                                                                                                                                                                      |                  |
| <b>Components of the intervention</b>         | <input type="checkbox"/> <b>Contrast</b><br><br><input type="checkbox"/> <b>Saline</b><br><br><input type="checkbox"/> <b>Anaesthetics</b><br><br><input type="checkbox"/> <b>Drug:</b><br><br><input type="checkbox"/> <b>Device:</b><br><br><input type="checkbox"/> <b>Other:</b> |                  |
| <b>Total volume injected (ml)</b>             | <input type="checkbox"/>  _ _  ml<br><br><input type="checkbox"/> <b>Unclear</b>                                                                                                                                                                                                     |                  |
| <b>Number of participants randomised</b>      | _ _ _                                                                                                                                                                                                                                                                                |                  |
| <b>Number of participants analysed</b>        | _ _ _                                                                                                                                                                                                                                                                                |                  |
| <b>Number lost to follow-up (and reasons)</b> | _ _ _                                                                                                                                                                                                                                                                                |                  |
| <b>Number of IDT</b>                          | <input type="checkbox"/> <b>1</b><br><br><input type="checkbox"/> <b>2</b><br><br><input type="checkbox"/> <b>≥ 3</b>                                                                                                                                                                |                  |

|                                                                                                                                                                                        |                                                                                                                                                                                                                                                                                                                                                            |  |
|----------------------------------------------------------------------------------------------------------------------------------------------------------------------------------------|------------------------------------------------------------------------------------------------------------------------------------------------------------------------------------------------------------------------------------------------------------------------------------------------------------------------------------------------------------|--|
| <b>Who delivered the intervention?</b>                                                                                                                                                 | <input type="checkbox"/> <b>Radiologists</b><br><br><input type="checkbox"/> <b>Other</b>                                                                                                                                                                                                                                                                  |  |
| <b>Was intervention compliance assessed?</b><br><br><i>And if so, how? (includes (a) compliance of therapists to intervention protocol (b) adherence of participants to programme)</i> | <input type="checkbox"/> <b>Yes:</b><br><br><input type="checkbox"/> <b>No</b><br><br><input type="checkbox"/> <b>Unclear</b>                                                                                                                                                                                                                              |  |
| <b>Authorized co-interventions (if any)</b>                                                                                                                                            | <input type="checkbox"/> <b>Analgesics</b><br><br><input type="checkbox"/> <b>NSAIDS</b><br><br><input type="checkbox"/> <b>Other spinal injections</b><br><br><input type="checkbox"/> <b>Brace</b><br><br><input type="checkbox"/> <b>Physical therapy</b><br><br><input type="checkbox"/> <b>Other :</b><br><br><input type="checkbox"/> <b>Unclear</b> |  |
| <b>Notes</b>                                                                                                                                                                           |                                                                                                                                                                                                                                                                                                                                                            |  |

### COMPARATOR GROUP

|                                | Description as stated in report/paper                                                                                                                                                                                                                                                                                           | Location in text |
|--------------------------------|---------------------------------------------------------------------------------------------------------------------------------------------------------------------------------------------------------------------------------------------------------------------------------------------------------------------------------|------------------|
| <b>Comparator intervention</b> | <input type="checkbox"/> <b>Intradiscal injection</b><br><br><b>Details:</b><br><br><input type="checkbox"/> <b>Sham procedure</b><br><br><b>Details:</b><br><br><input type="checkbox"/> <b>Other spinal injection therapy</b><br><br><b>Details:</b><br><br><input type="checkbox"/> <b>Usual care</b><br><br><b>Details:</b> |                  |

|                                                                                                                                                                                      |                                                                                                                                                                                                                                                                                                                                   |  |
|--------------------------------------------------------------------------------------------------------------------------------------------------------------------------------------|-----------------------------------------------------------------------------------------------------------------------------------------------------------------------------------------------------------------------------------------------------------------------------------------------------------------------------------|--|
| <b>Number of participants randomised</b>                                                                                                                                             | _ _ _                                                                                                                                                                                                                                                                                                                             |  |
| <b>Number of participants analysed</b>                                                                                                                                               | _ _ _                                                                                                                                                                                                                                                                                                                             |  |
| <b>Number lost to follow-up (and reasons)</b>                                                                                                                                        | _ _ _                                                                                                                                                                                                                                                                                                                             |  |
| <b>Who delivered the intervention?</b>                                                                                                                                               | <input type="checkbox"/> <b>Radiologists</b><br><input type="checkbox"/> <b>Physician</b><br><input type="checkbox"/> <b>Physiotherapist</b><br><input type="checkbox"/> <b>Nurses</b><br><input type="checkbox"/> <b>Other</b>                                                                                                   |  |
| <b>Was intervention compliance assessed?</b><br><br><i>And if so, how? (includes (a) compliance of therapists to intervention protocol (b) adherence of participants to program)</i> | <input type="checkbox"/> <b>Yes:</b><br><input type="checkbox"/> <b>No</b><br><input type="checkbox"/> <b>Unclear</b>                                                                                                                                                                                                             |  |
| <b>Authorized co-interventions (if any)</b>                                                                                                                                          | <input type="checkbox"/> <b>Analgesics</b><br><input type="checkbox"/> <b>NSAIDS</b><br><input type="checkbox"/> <b>Other spinal injections</b><br><input type="checkbox"/> <b>Brace</b><br><input type="checkbox"/> <b>Physical therapy</b><br><input type="checkbox"/> <b>Other:</b><br><input type="checkbox"/> <b>Unclear</b> |  |
| <b>Notes</b>                                                                                                                                                                         |                                                                                                                                                                                                                                                                                                                                   |  |

## OUTCOMES

### LOW BACK PAIN

| Tick box if outcome was reported                                                                                                                                      | Multiple intervention<br><input type="checkbox"/> |    |       | CONTROL |    |       | SUMMARY ESTIMATE               |                         |
|-----------------------------------------------------------------------------------------------------------------------------------------------------------------------|---------------------------------------------------|----|-------|---------|----|-------|--------------------------------|-------------------------|
|                                                                                                                                                                       | Mean                                              | SD | Total | Mean    | SD | Total | Mean difference between groups | 95% confidence interval |
| <b>LBP</b> <input type="checkbox"/><br><br><i>Type of validated scale used for measurement (i.e. NRS, VAS.)</i><br><br><b>SHORT TERM &lt; 3 months</b>                |                                                   |    |       |         |    |       |                                |                         |
| <b>LBP</b> <input type="checkbox"/><br><br><i>Type of validated scale used for measurement (i.e. NRS, VAS.)</i><br><br><b>MEDIUM TERM ≥ 3 months and &lt;6 months</b> |                                                   |    |       |         |    |       |                                |                         |
| <b>LBP</b> <input type="checkbox"/><br><br><i>Type of validated scale used for measurement (i.e. NRS, VAS.)</i><br><br><b>LONG TERM ≥ 6 months</b>                    |                                                   |    |       |         |    |       |                                |                         |

**ACTIVITY LIMITATIONS**

| Tick box if outcome was reported                                                                                                                                           | Multiple intervention <input type="checkbox"/>       |  |  | CONTROL |    |       | SUMMARY ESTIMATE               |                         |
|----------------------------------------------------------------------------------------------------------------------------------------------------------------------------|------------------------------------------------------|--|--|---------|----|-------|--------------------------------|-------------------------|
|                                                                                                                                                                            | Multifactorial intervention <input type="checkbox"/> |  |  | Mean    | SD | Total | Mean difference between groups | 95% confidence interval |
| Disability <input type="checkbox"/><br><br><i>Type of validated scale used for measurement (i.e. ODI, RMQDI...)</i><br><br><b>SHORT TERM &lt; 3 months</b>                 |                                                      |  |  |         |    |       |                                |                         |
| Disability <input type="checkbox"/><br><br><i>Type of validated scale used for measurement (i.e. ODI, RMQDI...)</i><br><br><b>MEDIUM TERM ≥ 3 months and &lt; 6 months</b> |                                                      |  |  |         |    |       |                                |                         |
| Disability <input type="checkbox"/><br><br><i>Type of validated scale used for measurement (i.e. ODI, RMQDI...)</i><br><br><b>LONG TERM ≥ 6 months</b>                     |                                                      |  |  |         |    |       |                                |                         |



**EMPLOYMENT STATUS**

|                                                                                                  |                                        |                         |                                        |                         |                         |                         |
|--------------------------------------------------------------------------------------------------|----------------------------------------|-------------------------|----------------------------------------|-------------------------|-------------------------|-------------------------|
| Multiple intervention <input type="checkbox"/>                                                   | <b>INTERVENTION</b>                    |                         | <b>CONTROL</b>                         |                         | <b>SUMMARY ESTIMATE</b> |                         |
| Multifactorial intervention <input type="checkbox"/>                                             |                                        |                         |                                        |                         |                         |                         |
| Tick box if outcome was reported                                                                 | Total number of patients on sick leave | Number of person months | Total number of patients on sick leave | Number of person months | Odds ratio              | 95% confidence interval |
| Rate of patients on sick leave <input type="checkbox"/><br>SHORT TERM < 3 months                 |                                        |                         |                                        |                         |                         |                         |
| Rate of patients on sick leave <input type="checkbox"/><br>MEDIUM TERM, ≥ 3 months and <6 months |                                        |                         |                                        |                         |                         |                         |
| Rate of patients on sick leave <input type="checkbox"/><br>LONG TERM ≥ 6 months                  |                                        |                         |                                        |                         |                         |                         |

**MAJOR ADVERSE EVENT**

|                                                          |                                     |                         |                                     |                         |                         |                         |
|----------------------------------------------------------|-------------------------------------|-------------------------|-------------------------------------|-------------------------|-------------------------|-------------------------|
| Multiple intervention <input type="checkbox"/>           | <b>INTERVENTION</b>                 |                         | <b>CONTROL</b>                      |                         | <b>SUMMARY ESTIMATE</b> |                         |
| Multifactorial intervention <input type="checkbox"/>     |                                     |                         |                                     |                         |                         |                         |
| Tick box if outcome was reported                         | Total number of major adverse event | Number of person months | Total number of major adverse event | Number of person months | Odds ratio              | 95% confidence interval |
| Rate of all major adverse event <input type="checkbox"/> |                                     |                         |                                     |                         |                         |                         |
| Rate of major bleeding <input type="checkbox"/>          |                                     |                         |                                     |                         |                         |                         |

|                                                                                                                                   |  |  |  |  |  |  |
|-----------------------------------------------------------------------------------------------------------------------------------|--|--|--|--|--|--|
| Rate of neurological complication <input type="checkbox"/>                                                                        |  |  |  |  |  |  |
| Rate of serious infections <input type="checkbox"/>                                                                               |  |  |  |  |  |  |
| Rate of death <input type="checkbox"/>                                                                                            |  |  |  |  |  |  |
| NB: briefly outline how participants' major adverse event were recorded i.e. recorded daily or monthly-prospective, retrospective |  |  |  |  |  |  |

***MINOR ADVERSE EVENT***

| Multiple intervention <input type="checkbox"/><br>Multifactorial intervention <input type="checkbox"/> | INTERVENTION                        |                         | CONTROL                             |                         | SUMMARY ESTIMATE |                         |
|--------------------------------------------------------------------------------------------------------|-------------------------------------|-------------------------|-------------------------------------|-------------------------|------------------|-------------------------|
|                                                                                                        | Total number of minor adverse event | Number of person months | Total number of minor adverse event | Number of person months | Odds ratio       | 95% confidence interval |
| Tick box if outcome was reported                                                                       |                                     |                         |                                     |                         |                  |                         |
| Rate of over all adverse events <input type="checkbox"/>                                               |                                     |                         |                                     |                         |                  |                         |
| Rate of minor bleeding <input type="checkbox"/>                                                        |                                     |                         |                                     |                         |                  |                         |
| Rate of acute pain per-procedure <input type="checkbox"/>                                              |                                     |                         |                                     |                         |                  |                         |
| Rate of vasovagal reaction <input type="checkbox"/>                                                    |                                     |                         |                                     |                         |                  |                         |
| Rate of skin infections <input type="checkbox"/>                                                       |                                     |                         |                                     |                         |                  |                         |

|                                                                                                                                           |  |  |  |  |  |  |
|-------------------------------------------------------------------------------------------------------------------------------------------|--|--|--|--|--|--|
| <b>Rate of IVD narrowing</b><br><input type="checkbox"/>                                                                                  |  |  |  |  |  |  |
| <b>Rate of IVD calcifications</b> <input type="checkbox"/>                                                                                |  |  |  |  |  |  |
| <b>NB: Briefly outline how participants' minor adverse event were recorded i.e. recorded daily or monthly- prospective, retrospective</b> |  |  |  |  |  |  |

**Appendix 5. Risk of bias within studies, using the JADAD scale.**

|                  | Reported as randomized | Randomization is appropriate | Double blinding is reported | Double blinding is appropriate | Withdrawals are reported by number and reason per arm |
|------------------|------------------------|------------------------------|-----------------------------|--------------------------------|-------------------------------------------------------|
| Cao, 2011        | +                      | ?                            | +                           | ?                              | +                                                     |
| Cohen            | +                      | ?                            | +                           | +                              | -                                                     |
| Sainoh, 2015     | +                      | ?                            | -                           | -                              | +                                                     |
| Sainoh, 2016     | +                      | ?                            | -                           | ?                              | +                                                     |
| Peng, 2010       | +                      | ?                            | +                           | +                              | +                                                     |
| Nguyen, 2017     | +                      | +                            | +                           | +                              | +                                                     |
| Tavares, 2018    | +                      | +                            | +                           | -                              | +                                                     |
| Tuakli, 2015     | +                      | +                            | +                           | +                              | +                                                     |
| Yu, 2012         | +                      | +                            | +                           | ?                              | -                                                     |
| Khot, 2002       | +                      | ?                            | -                           | ?                              | +                                                     |
| Elawarmy, 2018   | +                      | ?                            | -                           | -                              | +                                                     |
| Kotilainen, 1997 | +                      | ?                            | ?                           | ?                              | -                                                     |
| Niu, 2018        | +                      | ?                            | ?                           | ?                              | -                                                     |
| Feldman, 1986    | +                      | +                            | +                           | ?                              | -                                                     |
| NTC 01182337     | +                      | ?                            | +                           | ?                              | +                                                     |
| NTC 01124006     | +                      | ?                            | +                           | ?                              | +                                                     |
| Noriega, 2016    | +                      | +                            | +                           | ?                              | -                                                     |
| Kallewaard, 2019 | +                      | +                            | +                           | +                              | +                                                     |

 unclear

 reported

 not reported

## Appendix 6. Reason for exclusion of full-text reviewed studies.

| Title                                                                                                                                                            | Author             | Year | Reason for exclusion                                                     |
|------------------------------------------------------------------------------------------------------------------------------------------------------------------|--------------------|------|--------------------------------------------------------------------------|
| Prospective and randomized study in patients with low back pain or sciatic pain with ozone therapy treatment                                                     | Ansede Alonso J.C. | 2007 | Uncontrolled                                                             |
| Advances in cellular therapies: Clinical trial on lumbar degenerative disease                                                                                    | Ardura Aragón F.   | 2017 | Not Randomized                                                           |
| Single-blind randomised controlled trial of chemonucleolysis and manipulation in the treatment of symptomatic lumbar disc herniation.                            | Burton             | 2007 | ID under general anesthesia and assessment of effectiveness for leg pain |
| Sciatica: treatment with intradiscal and intraforaminal injections of steroid and oxygen-ozone versus steroid only.                                              | Galluci            | 2007 | ID and foraminal injection, assessment for leg pain only                 |
| Dexamethasone is not superior to placebo for treating lumbosacral radicular pain.                                                                                | Haimovic           | 1986 | Intervention reported other than ID therapy                              |
| [Experiences with intradisk injection treatment with chymopapain and collagenase]                                                                                | Hedtmann           | 1986 | Review                                                                   |
| Radiopaque Gelified Ethanol Application in Lumbar Intervertebral Soft Disc Herniations: Croatian Multicentric Study.                                             | Houra              | 2017 | Uncontrolled                                                             |
| Intradiskal methylene blue treatment for diskogenic low back pain.                                                                                               | Levi               | 2014 | Uncontrolled                                                             |
| CT-guided ozone/steroid therapy for the treatment of degenerative spinal disease--effect of age, gender, disc pathology and multi-segmental changes              | Oder               | 2008 | Not randomized                                                           |
| Anti-inflammatory Chitosan/Poly-gamma-glutamic acid nanoparticles control inflammation while remodeling extracellular matrix in degenerated intervertebral disc. | Teixeira           | 2016 | Condition reported other than LBP                                        |
| [Evaluation of 5 years of nucleolysis treatment in 150 cases of radiculalgia and 10 cases of lumbago of disk origin].                                            | Troisier           | 1982 | Condition reported other than LBP                                        |
| Treatment of the lumbar disc herniation with intradiscal and intraforaminal injection of oxygen-ozone                                                            | Zhang              | 2013 | Off the topic                                                            |
| A randomized, double-blind study to compare low-dose with standard-dose chymopapain in the treatment of herniated lumbar intervertebral discs                    | Benoist            | 1993 | Assessment of effectiveness for leg pain only                            |
| Kinesiatrics and oxygen-ozone therapy for lumbosacral disc-root compression                                                                                      | Romeo A            | 2001 | Intervention reported other than ID therapy                              |
| Adipose-derived stem cells improve the viability of nucleus pulposus cells in degenerated intervertebral discs.                                                  | Song               | 2015 | Intervention reported other than ID therapy                              |
| Five-year results from chemonucleolysis with chymopapain or collagenase: a prospective randomized study.                                                         | Wittenberg         | 2001 | Assessment of effectiveness for leg pain only                            |
| Implication of Two Doses of O2-O3 Upon the Pain Alleviation in Patients With Low Back Pain                                                                       | Zarief             |      | Duplicate                                                                |
| Variable Approaches of Intradiscal O3-O2 Injection                                                                                                               | Zarief             |      | Refused to communicate data                                              |
| Efficacy of Intradiscal Injection of Viable Placental Tissue Extract in Subjects With One or Two Level,                                                          | Parker             |      | Refused to communicate data because of limited ownership rights          |

|                                                                                                                                                                                              |                       |      |                                                                 |
|----------------------------------------------------------------------------------------------------------------------------------------------------------------------------------------------|-----------------------|------|-----------------------------------------------------------------|
| <b>Symptomatic Lumbar Intervertebral Disc Degeneration</b>                                                                                                                                   |                       |      |                                                                 |
| <b>Treatment of Discogenic Back Pain</b>                                                                                                                                                     | Caire                 |      | Study stopped early                                             |
| <b>Safety, Tolerability and Efficacy of YH14618 in Patients With Degenerative Disc Disease</b>                                                                                               | Young-Joon Kwon       |      | Awaiting assessment                                             |
| <b>Implication of Two Doses of O2-O3 Upon the Pain Alleviation in Patients With Low Back Pain</b>                                                                                            |                       |      | Duplicate                                                       |
| <b>Safety and Preliminary Efficacy Study of Mesenchymal Precursor Cells (MPCs) in Subjects With Lumbar Back Pain</b>                                                                         | Brown                 |      | Refused to communicate data because of limited ownership rights |
| <b>Treatment of Degenerative Disc Disease With Allogenic Mesenchymal Stem Cells (MSV)</b>                                                                                                    |                       |      | Duplicate                                                       |
| <b>Clinical Trial of YH14618 in Patients With Degenerative Disc Disease</b>                                                                                                                  | Su Youn Nam           |      | Awaiting assessment                                             |
| <b>A Study of SI-6603 in Patients With Lumbar Disc Herniation</b>                                                                                                                            | Seikagaku Corporation |      | Awaiting assessment                                             |
| <b>Backache and sciatica. A report of 90 patients treated by intradiscal injection of chymopapain (discase).</b>                                                                             | Grahams               | 1974 | ID under general anesthesia                                     |
| <b>Chemonucleolysis. A preliminary report on a double blind study comparing chemonucleolysis and intradiscal administration of hydrocortisone in the treatment of backache and sciatica.</b> | Grahams               | 1975 | ID under general anesthesia, duplicate                          |
| <b>Intradiscal steroid: a prospective double blind clinical trial</b>                                                                                                                        | Simmons               | 1992 | No response                                                     |

**Appendix 18. Risk of bias within studies, using the revised Cochrane Risk of Bias tool.**

|                  | Random sequence generation | Allocation concealment | Blinding of participants and personnel | Blinding of outcomes assessment | Incomplete outcome data | Selective reporting | Other sources of bias |   |
|------------------|----------------------------|------------------------|----------------------------------------|---------------------------------|-------------------------|---------------------|-----------------------|---|
| Cao, 2011        | +                          | ?                      | +                                      | ?                               | +                       | +                   | ?                     | ? |
| Cohen2007        | +                          | ?                      | +                                      | +                               | +                       | +                   | ?                     | + |
| Sainoh, 2015     | +                          | ?                      | +                                      | +                               | ?                       | +                   | ?                     | + |
| Sainoh, 2016     | +                          | ?                      | +                                      | +                               | +                       | +                   | ?                     | + |
| Peng, 2010       | +                          | ?                      | +                                      | +                               | +                       | +                   | ?                     | + |
| Nguyen, 2017     | +                          | +                      | +                                      | +                               | +                       | +                   | +                     | + |
| Tavares, 2018    | +                          | +                      | ?                                      | ?                               | +                       | +                   | +                     | + |
| Tuakli, 2015     | +                          | +                      | +                                      | +                               | +                       | +                   | +                     | + |
| Yu, 2012         | +                          | +                      | ?                                      | ?                               | ?                       | +                   | ?                     | + |
| Khot, 2002       | +                          | +                      | +                                      | ?                               | +                       | +                   | ?                     | + |
| Elawarny, 2018   | +                          | ?                      | +                                      | +                               | +                       | +                   | ?                     | + |
| Kotilainen, 1997 | +                          | ?                      | +                                      | ?                               | ?                       | +                   | ?                     | + |
| Niu, 2018        | +                          | ?                      | ?                                      | ?                               | ?                       | +                   | ?                     | + |
| Feldman, 1986    | +                          | +                      | +                                      | ?                               | +                       | ?                   | ?                     | + |
| NTC 01182337     | +                          | ?                      | ?                                      | ?                               | +                       | +                   | ?                     | + |
| NTC 01124006     | +                          | ?                      | ?                                      | ?                               | +                       | +                   | ?                     | + |
| Noriega, 2016    | +                          | +                      | +                                      | ?                               | ?                       | +                   | ?                     | + |
| Kallewaard, 2019 | +                          | +                      | +                                      | +                               | +                       | +                   | +                     | + |

? unclear  
+ reported  
+ not reported



## Appendix 8a. Forest plot for pain, comparing intervertebral disc therapy (IDT) of corticosteroid versus placebo: sensitivity analysis.

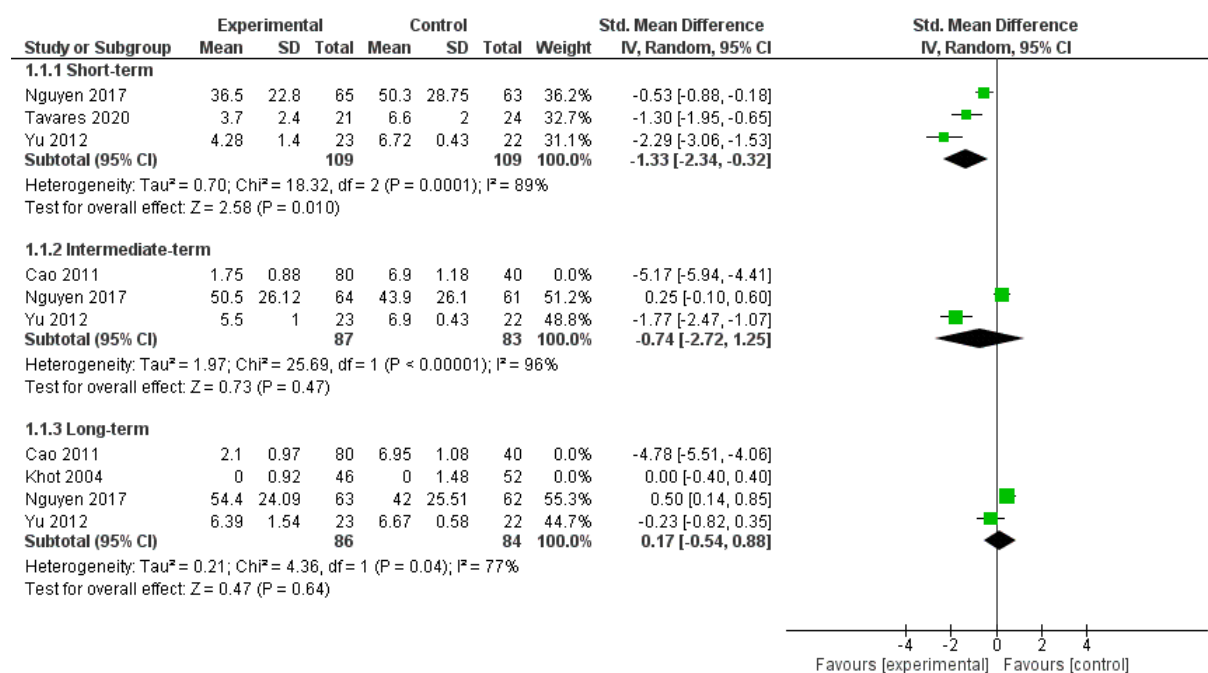

## Appendix 8b. Forest plot for activity limitations, comparing IDT of corticosteroid versus placebo: sensitivity analysis.

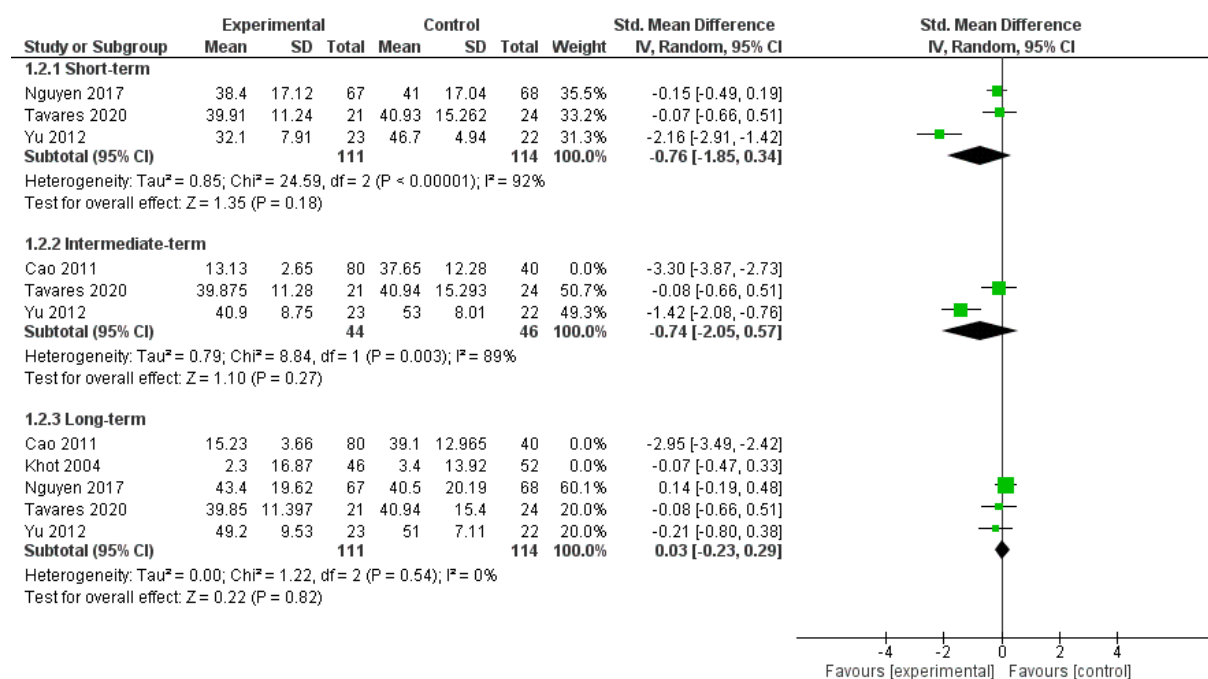

**Appendix 9a. Forest plot for pain at short term, comparing IDT of etanercept *versus* placebo.**

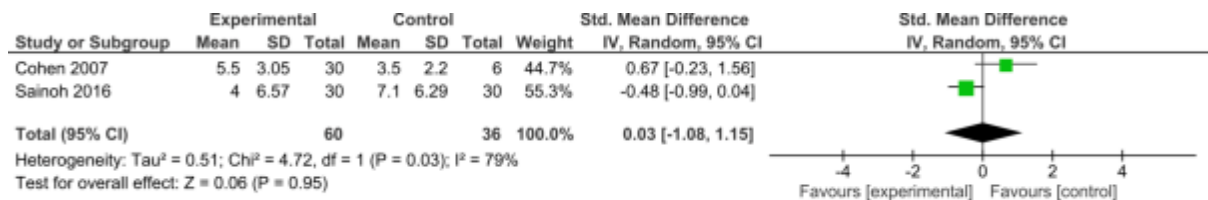

**Appendix 9b. Forest plot for activity limitations at short term, comparing IDT of etanercept *versus* placebo.**

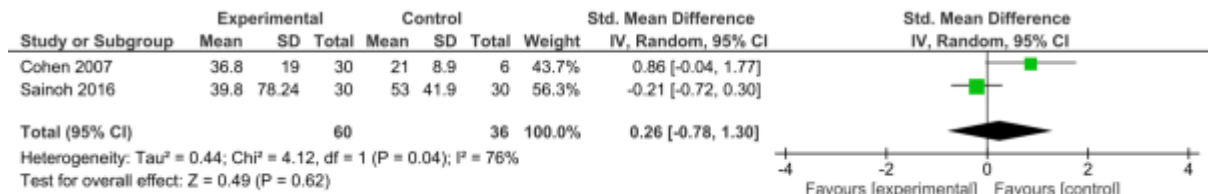

**Appendix 10a. Forest plot for pain at short term, comparing IDT of tocilizumab versus placebo.**

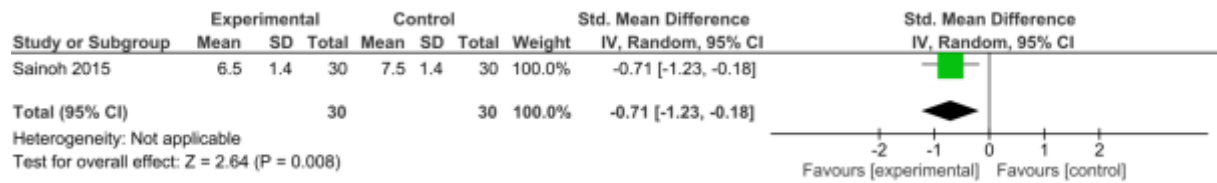

**Appendix 10b. Forest plot for activity limitations at short term, comparing IDT of tocilizumab versus placebo.**

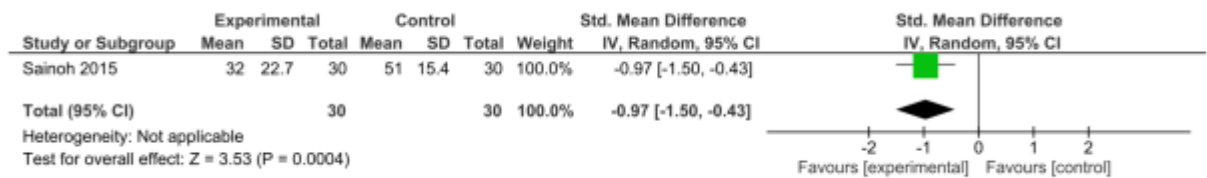

## Appendix 11a. Forest plot for pain at short, intermediate and long terms, comparing IDT of methylene blue versus placebo.

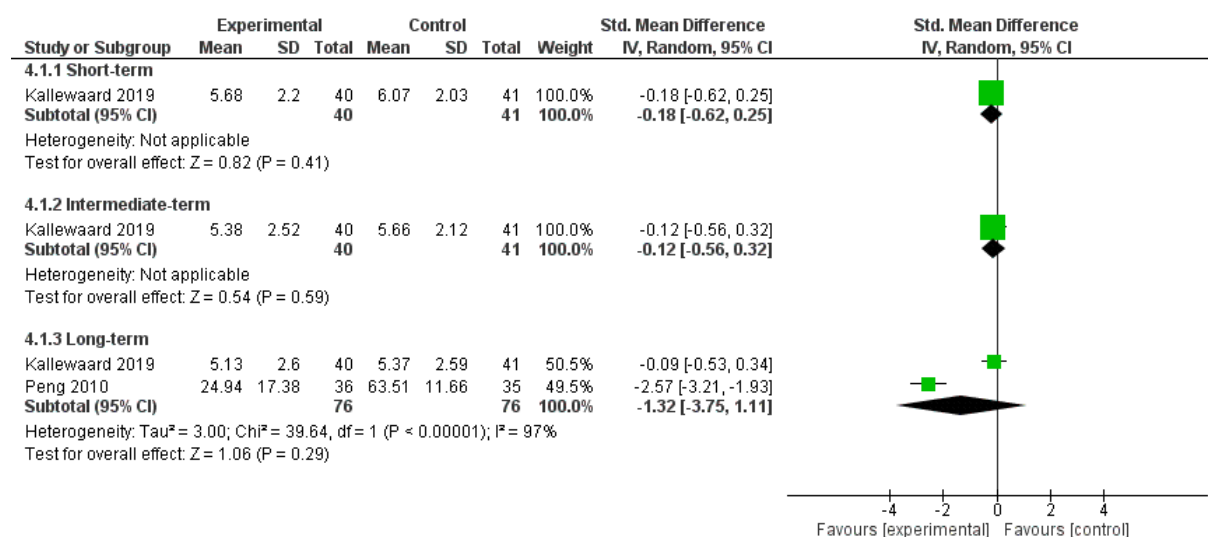

## Appendix 11b. Forest plot for activity limitations at short, intermediate and long terms, comparing IDT of methylene blue versus placebo.

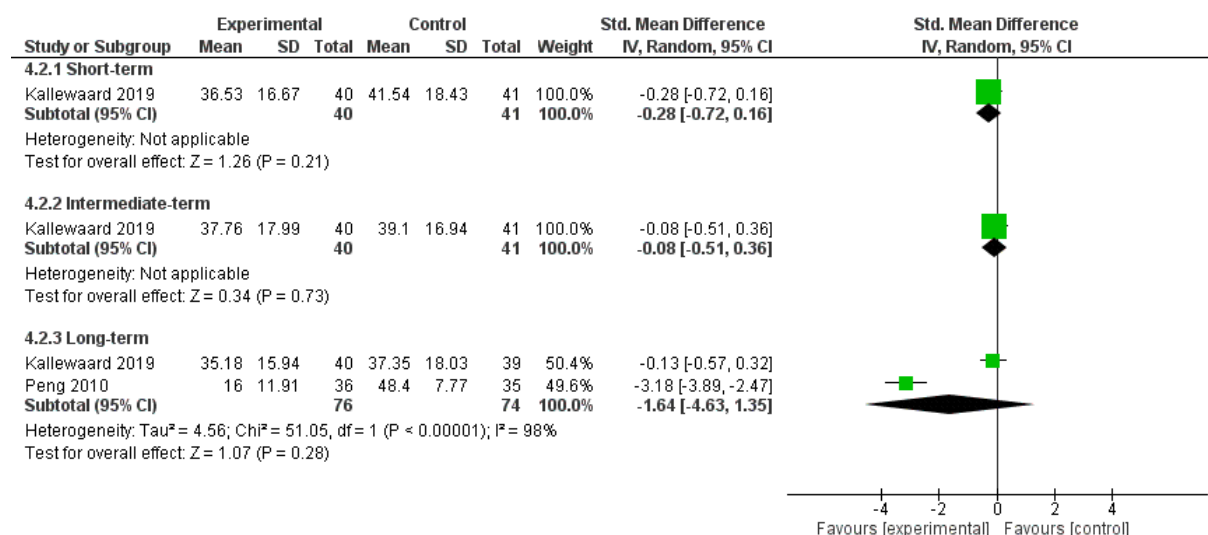

**Appendix 12a. Forest plot for pain, comparing IDT of ozone 40 µg/ml versus ozone 30 µg/ml.**

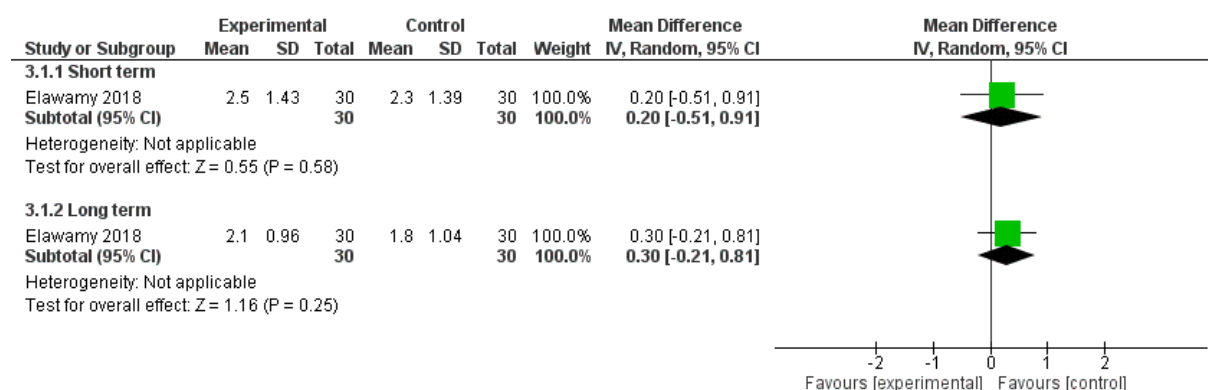

**Appendix 12b. Forest plot for activity limitations, comparing IDT of ozone 40 µg/ml versus ozone 30 µg/ml.**

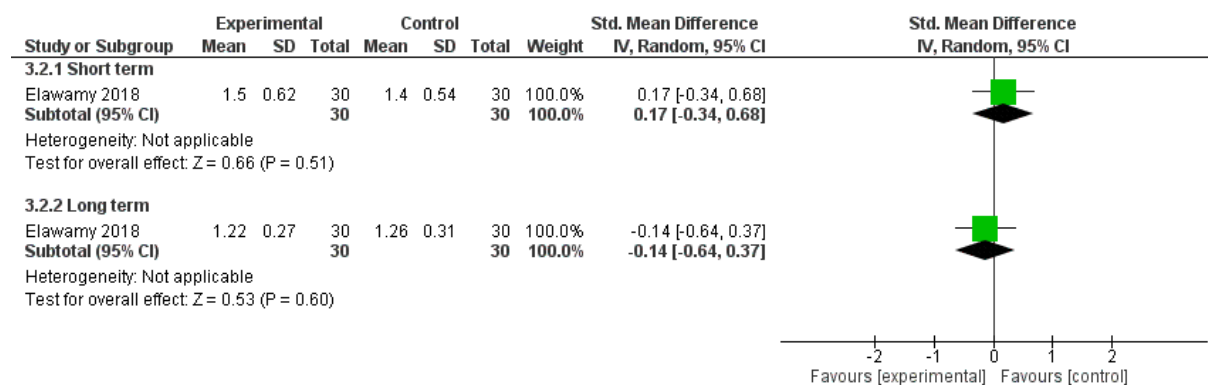

**Appendix 13. Forest plot for pain at long term, comparing IDT of ozone versus usual care.**

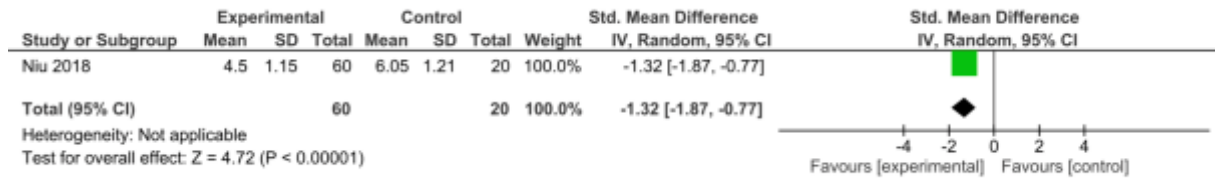

**Appendix 14a. Forest plot for pain at short term, comparing IDT of glycerol versus placebo.**

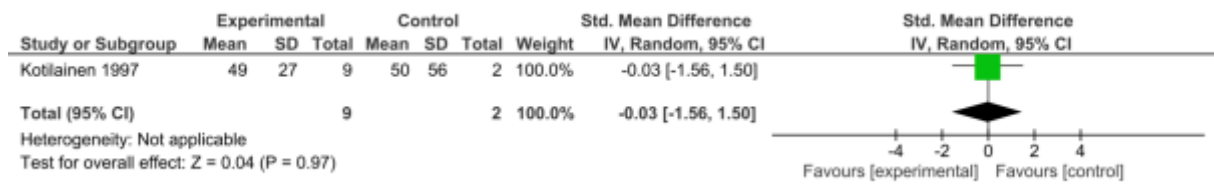

**Appendix 14b. Forest plot for activity limitations at short term, comparing IDT of glycerol versus placebo.**

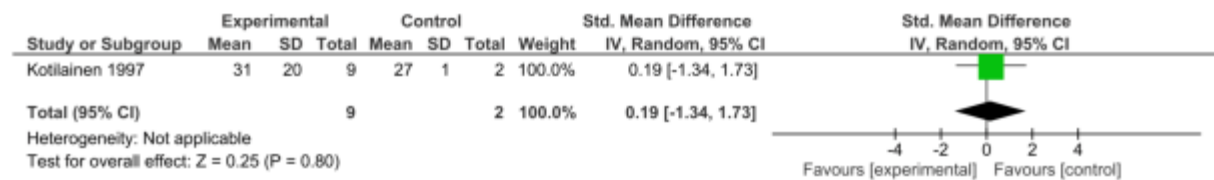

## Appendix 15a. Forest plot for pain, comparing IDT of stem cells versus placebo.

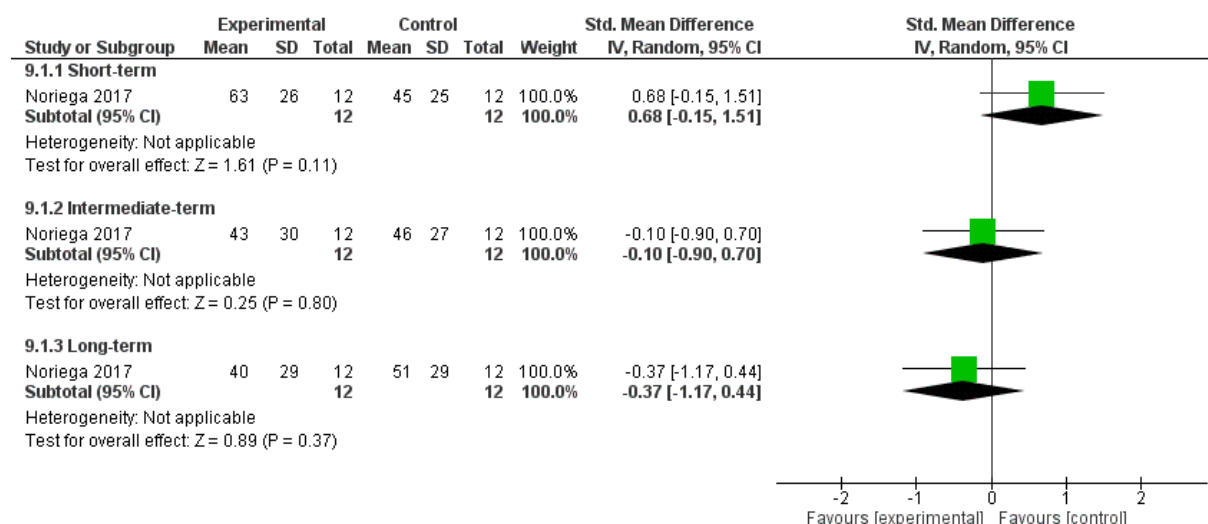

## Appendix 15b. Forest plot for activity limitations, comparing IDT of stem cells versus placebo.

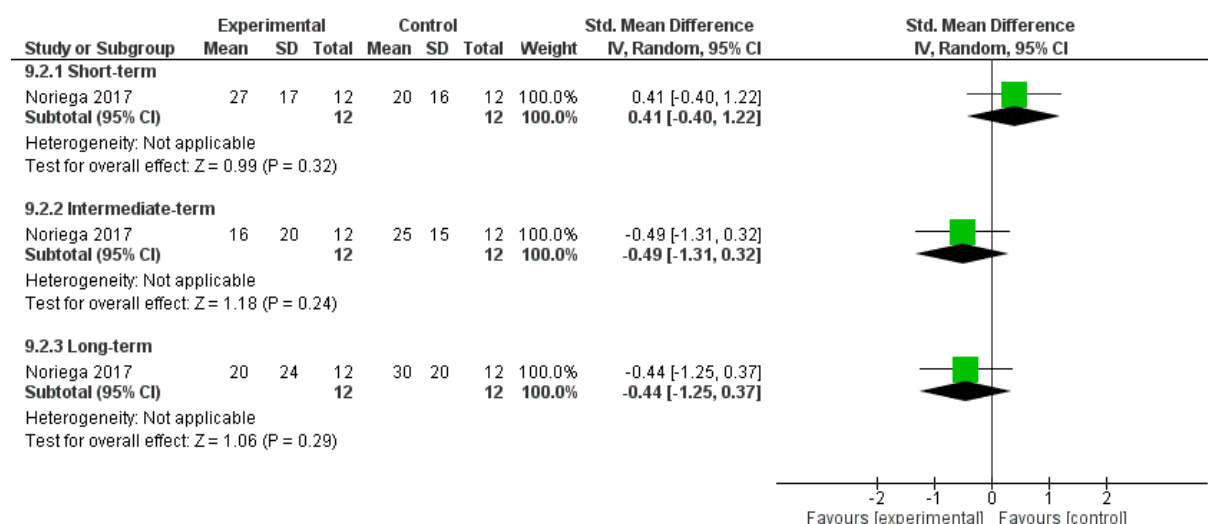



**Appendix 16a. Forest plot for pain at short term, comparing IDT of platelet-rich plasma versus placebo.**

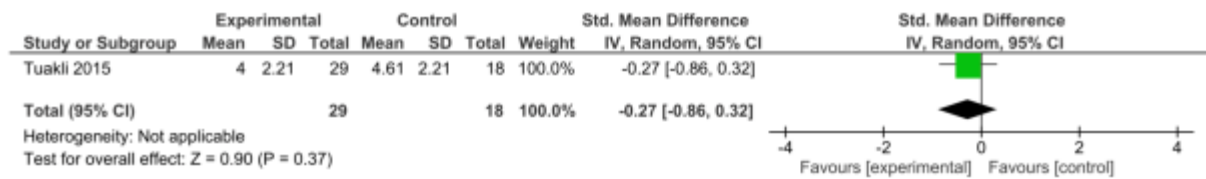

**Appendix 16b. Forest plot for activity limitations at short term, comparing IDT of platelet-rich plasma versus placebo.**

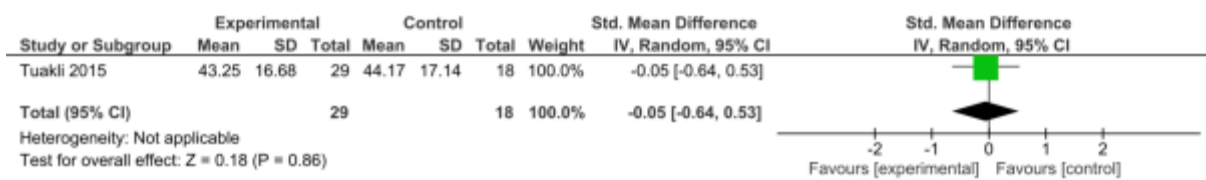

**Appendix 17a. Forest plot for pain at long term, comparing IDT of rhGDF-5 versus placebo.**

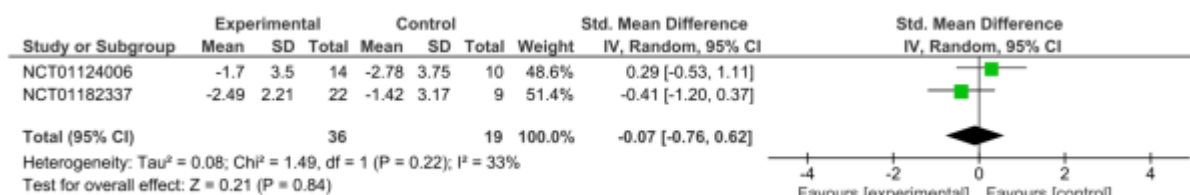

**Appendix 17b. Forest plot for activity limitations at long term, comparing IDT of rhGDF-5 versus placebo.**

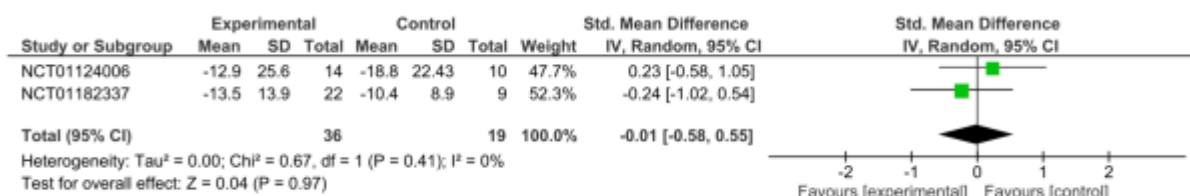

## Appendix 18. Forest plot for adverse events of corticosteroid IDT.

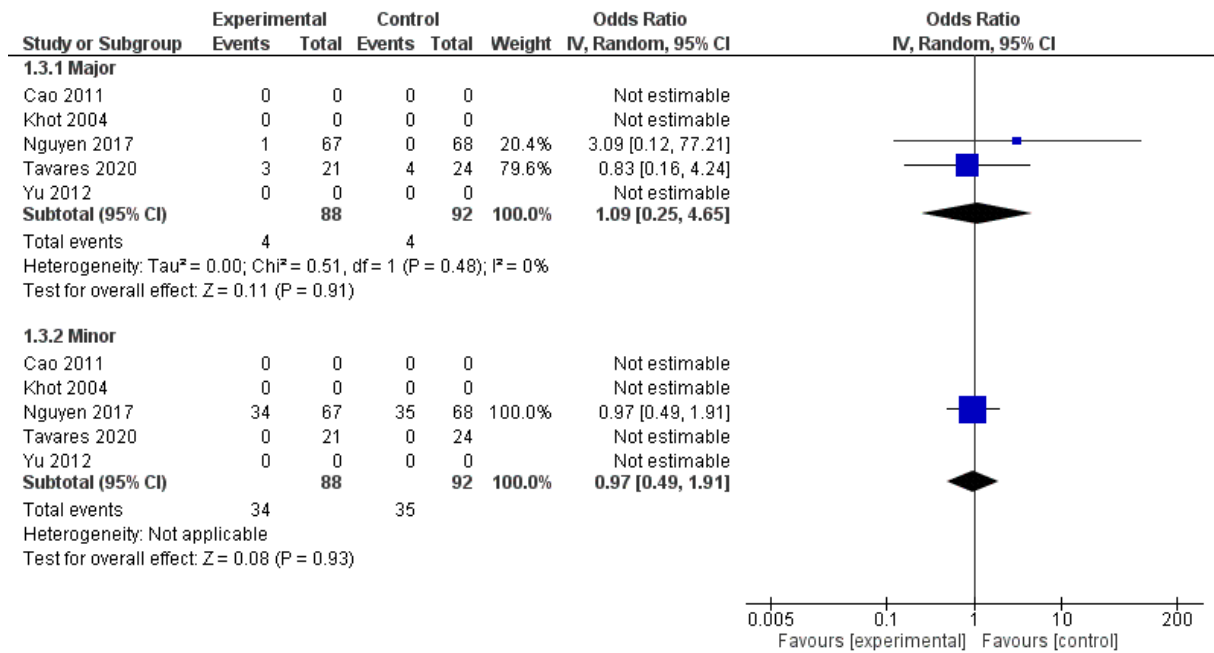

Supplement: sj-pdf-1-tab-10.1177_1759720X211028001.pdf [file sj-pdf-1-tab-10.1177_1759720X211028001.pdf]
